# Supplementary material for: The effect of insulin on equine lamellar basal epithelial cells mediated by the insulin-like growth factor-1 receptor
Source: PeerJ. 2018 Nov 29;6:e5945. doi: 10.7717/peerj.5945 (PMC6275117; doi:10.7717/peerj.5945)
Supplement: Supplemental Information 2 — Raw data from cell proliferation experiments (Figures 1–3) and Western blot densitometry (Figure 4). Values are expressed relative to control. [file peerj-06-5945-s002.xlsx]

## Sheet: Sheet1
Figure 2:	Percentage increase in cell number
	n=	1	2	3	4	5	6	7	8	9	10	11	12	13	14	15	16	17	18
	0	0	0	0	0	0	0	0	0	0	0	0	0	0	0	0	0	0	0
	10	3.23889	7.89367	4.73628	5.28194	4.97883	1.11835	3.97348	0.13738	6.77284	5.81627	4.22655	7.3855	4.55661	-1.08303	8.55215	5.45057	3.22581	1.23457
insulin	50	19.2694	51.8354	29.3673	35.0254	45.325	11.4309	27.451	-0.873999	39.2126	29.1498	41.7883	20.7516	10.0031	8.48556	10.7597	10.4462	8.88889	7.6734
concentration	100	40.548	77.4194	59.7734	55.4145	37.5779	32.6938	13.8039	21.1945	28.0315	13.3603	87.5912	62.402	10.0031	9.04031	17.3243	8.77515	23.0824	6.633
	250	24.1096	55.2837	34.7498	31.9797	37.667	32.1343	29.5686	32.2651	48.3465	39.946	102.92	119.118	17.5667	8.46871	16.3708	18.8976	11.2545	4.59035
	500	30.3196	57.5083	18.7913	29.1032	51.8255	28.5372	32.8627	24.035	107.874	72.7395	110.584	131.495	16.4621	11.7178	15.0235	18.7577	20.8244	15.1179
	1000	68.3105	121.135	81.0198	61.5059	61.2645	36.6906	38.5098	35.1784	117.638	91.9028	170.073	181.005	18.8094	6.87425	16.0434	16.1592	6.41577	11.0774
	2000	26.3927	47.386	43.9094	24.9577	71.683	32.0544	39.451	27.8951	114.646	80.7018	141.606	187.255	7.2108	12.4037	17.0285	16.098	10.94	11.037
Figure 3a:	Percentage change in cell number
	n=	1	2	3	4	5	6	7	8	9	10	11	12
	negative control (no insulin)	0	0	0	0	0	0	0	0	0	0	0	0
	positive control	15.2416	41.9753	11.5942	33.4728	-6.41026	11.2971	9.09091	77.7778	80	22.5806	11.4286	56.7568
	blocking antibody	-40.9677	-44.6377	-32.4675	-57.6803	-21.9178	-21.8045	-25	-46.875	-44.4444	-15.7895	-25.641	-41.3793
	control antibody	35.5191	11.5183	62.9808	60	33.9181	34.6154	77.7778	105.882	45	37.5	37.931	58.8235
Figure 3b:	Percentage change in cell number
	n=	1	2	3	4	5	6
	negative control	0	0	0	0	0	0
	1 ng/ml rhIGF-1	18.9591	1.03806	10.2941	13.369	7.18232	17.2249
	5 ng/ml rhIGF-1	31.5985	28.7197	16.1765	45.9893	41.4365	32.0574
	5 ng/ml rhIGF-1 with blocking antibody	-5.20446	-3.11419	-6.61765	19.7861	29.8343	11.4832
Figure 4:	Percentage relative to control
	n=	1	2	3	4	5	6
	0	100	100	100	100	100	100
	rh-IGF-1 5ng/ml	152.728	134.834	176.274	130.373	198.826	124.274
	100	102.886	82.4728	133.364	92.9372	121.117	79.7584
	500	129	107.588	155.293	104.994	170.226	108.19
	1000	132.109	109.373	163.13	108.309	168.118	111.466
	2000	145.908	122.274	187.308	114.372	197.204	107.877
